# Supplementary material
Source: PubMed Central journal article supplement (PMC9077410)
Supplement: web_material_mvab142.pdf [file web_material_mvab142.pdf]

## Supplementary Materials:

**Table T1: Strains used in this study**

| Strains       | Descriptions                    | Source                                                 |
|---------------|---------------------------------|--------------------------------------------------------|
| MG1655        | <i>E. coli</i> MG1655 wild type | Laboratory stock                                       |
| $\Delta phoP$ | $\Delta phoP::kan$              | Gift from Prof. J Gowrishankar, CDFD, Hyderabad, India |
| $\Delta hfq$  | $\Delta hfq::kan$               | Gift from Prof. J Gowrishankar, CDFD, Hyderabad, India |
| $\Delta rpoS$ | $\Delta rpoS::kan$              | Gift from Prof. Umesh Varshney, IISc, Bengaluru, India |
| P1 Phage      | P1 $vir$                        | Laboratory stock                                       |

**Table T2: Oligonucleotides used in this study**

| Name           | Sequence (5' – 3')     |
|----------------|------------------------|
| <i>phoP</i> FP | ATGCGCGTACTGGTTGTTGAAG |
| <i>phoP</i> RP | AATCGGCAGTGAAACATCGTTG |
| 5S RNA FP      | TGCCTGGCGGCAGTAG       |
| 5S RNA RP      | ATGCCTGGCAGTTCCTACTC   |

|                                                  |                                                                                                                                     |
|--------------------------------------------------|-------------------------------------------------------------------------------------------------------------------------------------|
| <i>ryjB</i> FP for <i>in vitro</i> transcription | TAA TAC GAC TCA CTA TAG GGT CAT CCG TCG TTG ACT CCA                                                                                 |
| <i>ryjB</i> FP                                   | TCA TCC GTC GTT GAC TCC A                                                                                                           |
| <i>ryjB</i> RP                                   | CCT TCT GCG ATC CCT GCC GC                                                                                                          |
| <i>sgcA</i> FP                                   | ATGATTAACGATATTAATGGGTACAGGCA                                                                                                       |
| <i>sgcA</i> RP                                   | TCTGGTCGGGCGTGAGGCAA                                                                                                                |
| Cloning <i>ryjB</i> FP                           | CCAAGCTTTCATCCGTCGTTGACTCCAT                                                                                                        |
| Cloning <i>ryjB</i> RP                           | GGATCCCCTTCTGCGATCCCT                                                                                                               |
| Cloning <i>phoP</i> FP                           | CCCAAGCTTATGCGCGTACTGGTTGTT                                                                                                         |
| Cloning <i>phoP</i> RP                           | CGCGGATCCTCAGCGCAATTCGAACAG                                                                                                         |
| F1                                               | CTTCTCATCGTCATCCTTGTAATCGATATCATGATCTTTATAATC<br>CATATGAATATCCTCCTTA                                                                |
| F2                                               | AACTTTAAGGTGGTGACGTAACAACGCATTGTCTTCAACCAGT<br>ACGCGCACATAATCGCGTTACACTATTTTAATAATTAAGACAG<br>GGAGAAATAAAAATG TGTGTAGGCTGGAGCTGCTTC |
| RyjB probe                                       | Cy5-CCT TCT GCG ATC CCT GCC GC                                                                                                      |
